# Supplementary material for: Self assembled polyaniline nanofibers with enhanced electromagnetic shielding properties
Source: Royal Society of Chemistry journal article supplement (doi:10.1039/c5ra02113h), 2015-01-01
Supplement: c5ra02113h1.pdf [file c5ra02113h1.pdf]

## Supporting Information

### Self assembled polyaniline nanofibers with enhanced electromagnetic shielding properties

*Nina Joseph, Jobin Varghese and Mailadil T Sebastian\**

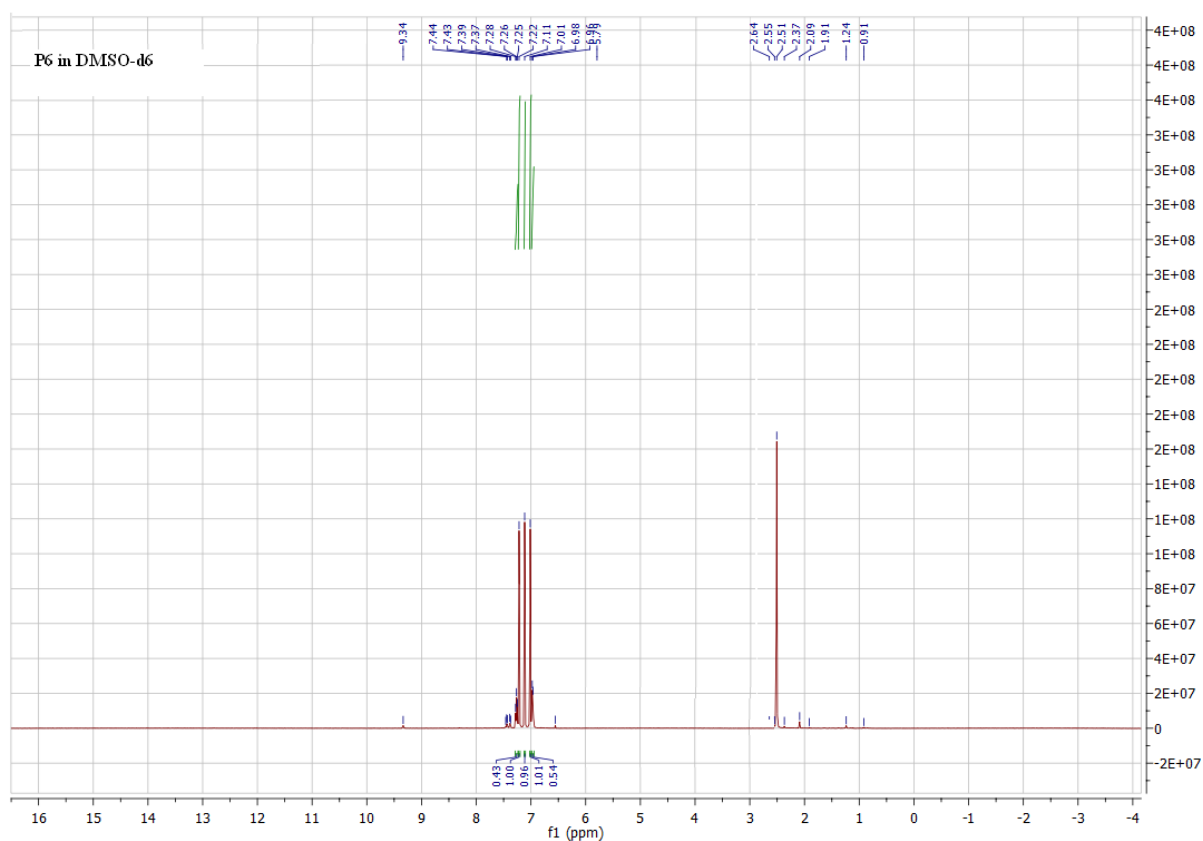

**Figure S1** <sup>1</sup>H NMR spectroscopy of P6 in DMSO-d<sub>6</sub>
